# Supplementary material
Source: publisher figshare collection journal article supplement (https://acs.figshare.com/ndownloader/files/4219084)
Supplement: Supplementary file 1 [file 4219084]

#\#CIF_1.1
 
#  CIF produced by WinGX routine CIF_UPDATE
#  Created on 2011-10-08 at 15:43:34
#  Using CIFtbx version 2.6.2 16 Jun 1998
 
#  Dictionary name : cif_core.dic
#  Dictionary vers : 2.4
#  Request file    : c:\wingx\files\archive.reqdat
#  CIF files read  : crystalclear struct
 
#------------------ SECTION 1. GLOBAL INFORMATION ---------------------------#
 
data_global
 
#------------------ AUDIT DETAILS -------------------------------------------#
 
_audit_creation_date            2011-10-08
_audit_creation_method          'WinGX routine CIF_UPDATE'
_audit_conform_dict_name        cif_core.dic
_audit_conform_dict_version     2.4
_audit_conform_dict_location    ftp://ftp.iucr.org/pub/cif_core.dic
_audit_update_record            ?
 
#==============================================================================
#
# SUBMISSION DETAILS
 
_publ_contact_author_name            'Susumu Kitagawa'
# Name of author for correspondence
 
_publ_contact_author_address
;
1.Institute for Integrated Cell-Material Sciences (iCeMS), Kyoto University, 
Yoshida,Sakyo-ku, Kyoto 606-8501, Japan
2. ERATO Kitagawa Integrated Pores Project, Kyoto Research Park Bldg #3, 
Shimogyo-ku, Kyoto 600-8815, Japan, and  
3. Department of Synthetic Chemistry and Biological Chemistry, 
Graduate School of Engineering, 
Kyoto University, Katsura,Nishikyo-ku, Kyoto 615-8510, Japan
;
# Address of author for correspondence
 
_publ_contact_author_email           'kitagawa@sbchem.kyoto-u.ac.jp'
_publ_contact_author_phone           '+81-75-383-2736'
  
 
#==============================================================================
#
# TITLE AND AUTHOR LIST
 
_publ_section_title
; ?
;
_publ_section_title_footnote
; ?
;
 
# The loop structure below should contain the names and addresses of all
# authors, in the required order of publication. Repeat as necessary.
 
loop_
 _publ_author_name
                
;
Foo, Maw Lin
Horike, Satoshi
Susumu, Kitagawa
;
 
#------------------  SECTION 2. COMPOUND(S) DETAILS -------------------------#
 
data_crystalclear
 
_audit_creation_date                    2011-10-08T15:43:34-00:00
_audit_creation_method                  'WinGX routine CIF_UPDATE'
 
#----------------------------------------------------------------------------#
#                   CHEMICAL INFORMATION                                     #
#----------------------------------------------------------------------------#
 
_chemical_name_systematic
;
 ?
;
_chemical_formula_moiety                'C27 H16 Ba1 O7'
_chemical_formula_sum                   'C27 H16 Ba O7'
_chemical_formula_weight                589.74
_chemical_compound_source               'synthesis as described'
_chemical_absolute_configuration        unk
 
#----------------------------------------------------------------------------#
#                   UNIT CELL INFORMATION                                    #
#----------------------------------------------------------------------------#
 
_symmetry_cell_setting                  orthorhombic
_symmetry_space_group_name_H-M          'P n a 21'
_symmetry_space_group_name_Hall         'P 2c -2n'
_symmetry_Int_Tables_number             33
loop_
    _symmetry_equiv_pos_as_xyz
'x, y, z'
'-x, -y, z+1/2'
'-x+1/2, y+1/2, z+1/2'
'x+1/2, -y+1/2, z'
 
_cell_length_a                          7.3162(11)
_cell_length_b                          19.404(3)
_cell_length_c                          26.155(4)
_cell_angle_alpha                       90
_cell_angle_beta                        90
_cell_angle_gamma                       90
_cell_volume                            3713.1(10)
_cell_formula_units_Z                   4
_cell_measurement_temperature           213(2)
_cell_measurement_reflns_used           0
_cell_measurement_theta_min             0
_cell_measurement_theta_max             0
_cell_measurement_wavelength            0.71073
 
#----------------------------------------------------------------------------#
#                   CRYSTAL INFORMATION                                      #
#----------------------------------------------------------------------------#
 
_exptl_crystal_description              prism
_exptl_crystal_colour                   colorless
_exptl_crystal_size_max                 0.2
_exptl_crystal_size_mid                 0.2
_exptl_crystal_size_min                 0.2
_exptl_crystal_density_diffrn           1.055
_exptl_crystal_density_method           'not measured'
_exptl_crystal_F_000                    1160
_exptl_special_details
;
 ?
;
 
#----------------------------------------------------------------------------#
#                   ABSORPTION CORRECTION                                    #
#----------------------------------------------------------------------------#
 
_exptl_absorpt_coefficient_mu           1.099
_exptl_absorpt_correction_type          none
 
#----------------------------------------------------------------------------#
#                   DATA COLLECTION                                          #
#----------------------------------------------------------------------------#
 
_diffrn_ambient_temperature             213(2)
_diffrn_radiation_wavelength            0.71075
_diffrn_radiation_type                  MoK\a
_diffrn_radiation_monochromator         graphite
_diffrn_radiation_probe                 x-ray
_diffrn_reflns_av_R_equivalents         0.0213
_diffrn_reflns_av_unetI/netI            0.0364
_diffrn_reflns_number                   16142
_diffrn_reflns_limit_h_min              -9
_diffrn_reflns_limit_h_max              8
_diffrn_reflns_limit_k_min              -25
_diffrn_reflns_limit_k_max              22
_diffrn_reflns_limit_l_min              -33
_diffrn_reflns_limit_l_max              19
_diffrn_reflns_theta_min                3.08
_diffrn_reflns_theta_max                27.49
_diffrn_reflns_theta_full               27.49
_diffrn_measured_fraction_theta_full
                                        0.992
_diffrn_measured_fraction_theta_max
                                        0.992
_reflns_number_total                    6001
_reflns_number_gt                       5214
_reflns_threshold_expression            >2sigma(I)
 
#----------------------------------------------------------------------------#
#                   COMPUTER PROGRAMS USED                                   #
#----------------------------------------------------------------------------#
 
_computing_structure_solution           'SHELXS-97 (Sheldrick, 1990)'
_computing_structure_refinement         'SHELXL-97 (Sheldrick, 1997)'
_computing_molecular_graphics           'Ortep-3 for Windows (Farrugia, 1997)'
_computing_publication_material
                                   'WinGX publication routines (Farrugia, 1999)'
 
#----------------------------------------------------------------------------#
#                   STRUCTURE SOLUTION
#----------------------------------------------------------------------------#
 
_atom_sites_solution_primary            direct
_atom_sites_solution_secondary          difmap
_atom_sites_solution_hydrogens          geom
 
#----------------------------------------------------------------------------#
#                   REFINEMENT INFORMATION                                   #
#----------------------------------------------------------------------------#
 
_refine_special_details
;
 Refinement of F^2^ against ALL reflections.  The weighted R-factor wR and
 goodness of fit S are based on F^2^, conventional R-factors R are based
 on F, with F set to zero for negative F^2^. The threshold expression of
 F^2^ > 2sigma(F^2^) is used only for calculating R-factors(gt) etc. and is
 not relevant to the choice of reflections for refinement.  R-factors based
 on F^2^ are statistically about twice as large as those based on F, and R-
 factors based on ALL data will be even larger.
;
_refine_ls_structure_factor_coef        Fsqd
_refine_ls_matrix_type                  full
_refine_ls_weighting_scheme             calc
_refine_ls_weighting_details
         'calc w=1/[\s^2^(Fo^2^)+(0.1081P)^2^+0.0000P] where P=(Fo^2^+2Fc^2^)/3'
_refine_ls_hydrogen_treatment           constr
_refine_ls_extinction_method            none
_refine_ls_number_reflns                6001
_refine_ls_number_parameters            316
_refine_ls_number_restraints            1
_refine_ls_R_factor_all                 0.0512
_refine_ls_R_factor_gt                  0.0469
_refine_ls_wR_factor_ref                0.1565
_refine_ls_wR_factor_gt                 0.1536
_refine_ls_goodness_of_fit_ref          1.119
_refine_ls_restrained_S_all             1.119
_refine_ls_shift/su_max                 0
_refine_ls_shift/su_mean                0
_refine_ls_abs_structure_details
                                    'Flack H D (1983), Acta Cryst. A39, 876-881'
_refine_ls_abs_structure_Flack          -0.01(3)
_refine_diff_density_max                1.402
_refine_diff_density_min                -0.438
_refine_diff_density_rms                0.148
 
#----------------------------------------------------------------------------#
#                   ATOMIC TYPES, COORDINATES AND THERMAL PARAMETERS         #
#----------------------------------------------------------------------------#
 
loop_
    _atom_type_symbol
    _atom_type_description
    _atom_type_scat_dispersion_real
    _atom_type_scat_dispersion_imag
    _atom_type_scat_source
C C 0.0033 0.0016 'International Tables Vol C Tables 4.2.6.8 and 6.1.1.4'
H H 0 0 'International Tables Vol C Tables 4.2.6.8 and 6.1.1.4'
O O 0.0106 0.006 'International Tables Vol C Tables 4.2.6.8 and 6.1.1.4'
Ba Ba -0.3244 2.2819 'International Tables Vol C Tables 4.2.6.8 and 6.1.1.4'
 
loop_
    _atom_site_label
    _atom_site_type_symbol
    _atom_site_fract_x
    _atom_site_fract_y
    _atom_site_fract_z
    _atom_site_U_iso_or_equiv
    _atom_site_adp_type
    _atom_site_occupancy
    _atom_site_symmetry_multiplicity
    _atom_site_calc_flag
    _atom_site_refinement_flags
    _atom_site_disorder_assembly
    _atom_site_disorder_group
C1 C 0.9023(9) 0.6884(3) 0.1962(3) 0.0295(16) Uani 1 1 d . . .
C2 C 0.9105(8) 0.8745(3) 0.0060(5) 0.0416(15) Uani 1 1 d . . .
H2 H 0.8687 0.8749 -0.028 0.05 Uiso 1 1 calc R . .
C3 C 0.9079(11) 0.8134(4) 0.0344(3) 0.039(2) Uani 1 1 d . . .
H3 H 0.8706 0.7724 0.0182 0.047 Uiso 1 1 calc R . .
C4 C 0.8421(12) 0.6870(3) 0.2512(3) 0.0302(14) Uani 1 1 d . . .
C5 C 0.7323(10) 0.6840(3) 0.3543(3) 0.0292(14) Uani 1 1 d . . .
C6 C 0.9953(10) 0.6833(3) 0.0933(3) 0.0314(15) Uani 1 1 d . . .
H6 H 1.0204 0.6815 0.0581 0.038 Uiso 1 1 calc R . .
C7 C 0.7504(10) 0.6284(3) 0.2711(3) 0.0354(15) Uani 1 1 d . . .
H7 H 0.7291 0.5905 0.2496 0.043 Uiso 1 1 calc R . .
C8 C 0.8713(9) 0.7422(4) 0.2830(3) 0.0359(16) Uani 1 1 d . . .
H8 H 0.93 0.7817 0.2703 0.043 Uiso 1 1 calc R . .
C9 C 0.9606(9) 0.6265(3) 0.1744(3) 0.0303(13) Uani 1 1 d . . .
H9 H 0.9705 0.5865 0.1945 0.036 Uiso 1 1 calc R . .
C10 C 1.0044(9) 0.6242(3) 0.1219(3) 0.0310(14) Uani 1 1 d . . .
C11 C 0.6930(11) 0.6256(4) 0.3201(3) 0.0402(17) Uani 1 1 d . . .
H11 H 0.629 0.5869 0.3323 0.048 Uiso 1 1 calc R . .
C12 C 0.9016(9) 0.7479(4) 0.1671(3) 0.0327(15) Uani 1 1 d . . .
H12 H 0.8682 0.7899 0.1824 0.039 Uiso 1 1 calc R . .
C13 C 0.9489(9) 0.7468(3) 0.1161(2) 0.0292(13) Uani 1 1 d . . .
C14 C 0.9589(12) 0.8109(3) 0.0860(3) 0.0324(15) Uani 1 1 d . . .
C15 C 0.8136(9) 0.7401(3) 0.3347(2) 0.0312(13) Uani 1 1 d . . .
H15 H 0.8328 0.7788 0.3556 0.037 Uiso 1 1 calc R . .
C16 C 0.6646(11) 0.6819(3) 0.4088(3) 0.0321(14) Uani 1 1 d . . .
C17 C 0.9861(9) 1.0004(3) 0.0013(4) 0.0416(16) Uani 1 1 d . . .
C18 C 0.9754(9) 0.9344(3) 0.0285(3) 0.0341(15) Uani 1 1 d . . .
C19 C 1.0482(9) 0.5556(3) 0.0986(3) 0.0306(13) Uani 1 1 d . . .
C20 C 1.0254(10) 0.8723(3) 0.1072(3) 0.0362(15) Uani 1 1 d . . .
H20 H 1.0664 0.8726 0.1413 0.043 Uiso 1 1 calc R . .
C21 C 1.1508(11) 0.5086(4) 0.1241(3) 0.0409(16) Uani 1 1 d . . .
H21 H 1.2044 0.5206 0.1556 0.049 Uiso 1 1 calc R . .
C22 C 0.9753(10) 0.5381(3) 0.0507(3) 0.0358(15) Uani 1 1 d . . .
H22 H 0.9111 0.5714 0.0317 0.043 Uiso 1 1 calc R . .
C23 C 1.1777(11) 0.4424(4) 0.1041(3) 0.0371(16) Uani 1 1 d . . .
H23 H 1.2492 0.4103 0.122 0.045 Uiso 1 1 calc R . .
C24 C 1.0319(10) 0.9321(4) 0.0791(3) 0.0391(16) Uani 1 1 d . . .
H24 H 1.0758 0.9726 0.0946 0.047 Uiso 1 1 calc R . .
C25 C 0.9964(10) 0.4738(3) 0.0314(2) 0.0354(15) Uani 1 1 d . . .
H25 H 0.9417 0.4624 0 0.043 Uiso 1 1 calc R . .
C26 C 1.0980(8) 0.4244(4) 0.0575(3) 0.0310(15) Uani 1 1 d . . .
C27 C 1.1094(9) 0.3502(4) 0.0392(3) 0.0345(16) Uani 1 1 d . . .
O1 O 1.2502(7) 0.3168(2) 0.0483(2) 0.0361(12) Uani 1 1 d . . .
O2 O 0.9732(6) 0.3283(2) 0.0143(3) 0.0441(15) Uani 1 1 d . . .
O3 O 1.0608(8) 1.0518(3) 0.0199(2) 0.0507(17) Uani 1 1 d . . .
O4 O 0.3584(14) 0.6708(6) 0.6103(4) 0.097(3) Uani 1 1 d . . .
O5 O 0.5710(7) 0.6295(3) 0.4229(2) 0.0422(12) Uani 1 1 d . . .
O6 O 0.6933(7) 0.7331(3) 0.43612(18) 0.0391(11) Uani 1 1 d . . .
O7 O 0.9085(7) 1.0015(3) -0.0440(2) 0.0550(16) Uani 1 1 d . . .
H7A H 0.9195 1.0404 -0.0567 0.083 Uiso 1 1 calc R . .
Ba1 Ba 0.39830(4) 0.693741(14) 0.50702(3) 0.02704(12) Uani 1 1 d . . .
 
loop_
    _atom_site_aniso_label
    _atom_site_aniso_U_11
    _atom_site_aniso_U_22
    _atom_site_aniso_U_33
    _atom_site_aniso_U_23
    _atom_site_aniso_U_13
    _atom_site_aniso_U_12
C1 0.034(4) 0.028(4) 0.027(4) -0.004(2) 0.003(2) 0.005(2)
C2 0.061(4) 0.029(3) 0.035(3) -0.005(6) 0.006(4) -0.003(3)
C3 0.057(6) 0.024(4) 0.036(5) 0.002(3) 0.002(3) -0.003(3)
C4 0.036(3) 0.027(3) 0.027(3) -0.003(2) 0.006(3) -0.005(3)
C5 0.033(4) 0.026(3) 0.029(3) -0.005(2) 0.008(3) -0.007(3)
C6 0.034(4) 0.029(3) 0.032(3) -0.002(2) 0.003(3) -0.007(3)
C7 0.048(4) 0.026(3) 0.032(3) -0.008(3) 0.010(3) -0.002(3)
C8 0.043(4) 0.027(3) 0.039(4) 0.003(3) 0.003(3) -0.009(3)
C9 0.034(3) 0.025(3) 0.032(3) -0.001(2) -0.002(3) -0.004(3)
C10 0.033(3) 0.022(3) 0.038(3) -0.003(3) 0.005(3) -0.003(3)
C11 0.059(5) 0.030(3) 0.032(3) -0.003(3) 0.011(3) 0.002(3)
C12 0.031(4) 0.026(3) 0.041(4) 0.000(3) 0.009(3) 0.002(2)
C13 0.030(3) 0.024(3) 0.033(3) 0.000(3) 0.000(3) 0.003(3)
C14 0.033(4) 0.024(3) 0.040(4) -0.001(3) 0.009(3) 0.000(3)
C15 0.039(4) 0.030(3) 0.025(3) -0.007(2) 0.004(3) -0.003(3)
C16 0.040(4) 0.031(3) 0.026(3) 0.003(3) -0.003(3) 0.004(3)
C17 0.040(3) 0.033(3) 0.052(5) 0.015(4) -0.003(4) 0.003(3)
C18 0.031(3) 0.025(3) 0.047(4) 0.003(3) 0.002(3) 0.003(3)
C19 0.036(3) 0.026(3) 0.030(3) -0.003(3) 0.005(3) 0.003(3)
C20 0.040(4) 0.026(3) 0.043(4) 0.000(3) -0.005(3) -0.003(3)
C21 0.051(4) 0.031(4) 0.040(4) -0.007(3) -0.008(3) 0.007(3)
C22 0.038(4) 0.026(3) 0.043(4) -0.003(3) -0.005(3) 0.004(3)
C23 0.043(4) 0.029(4) 0.039(4) -0.004(3) -0.006(3) 0.011(3)
C24 0.039(4) 0.029(4) 0.050(4) 0.005(3) 0.000(3) -0.004(3)
C25 0.044(4) 0.031(3) 0.031(3) -0.004(3) -0.003(3) 0.001(3)
C26 0.023(3) 0.026(3) 0.044(4) -0.005(3) 0.001(2) 0.002(2)
C27 0.037(4) 0.027(3) 0.039(4) -0.003(3) 0.008(3) -0.001(3)
O1 0.032(3) 0.031(3) 0.045(3) -0.013(2) -0.002(2) 0.007(2)
O2 0.028(2) 0.029(2) 0.074(5) -0.017(3) -0.007(3) -0.004(2)
O3 0.055(3) 0.027(3) 0.070(5) 0.013(3) -0.016(3) -0.007(2)
O4 0.098(6) 0.137(8) 0.055(5) 0.021(6) 0.015(5) 0.009(6)
O5 0.061(3) 0.031(3) 0.034(3) 0.004(2) 0.008(2) -0.002(2)
O6 0.047(3) 0.038(3) 0.033(2) -0.003(2) 0.007(2) -0.005(2)
O7 0.089(5) 0.031(3) 0.045(3) 0.005(3) -0.012(3) -0.007(3)
Ba1 0.02695(19) 0.02287(18) 0.03131(19) 0.0015(2) 0.0012(2) 0.00036(11)
 
 
#----------------------------------------------------------------------------#
#                   MOLECULAR GEOMETRY                                       #
#----------------------------------------------------------------------------#
 
_geom_special_details
;
 All esds (except the esd in the dihedral angle between two l.s. planes)
 are estimated using the full covariance matrix.  The cell esds are taken
 into account individually in the estimation of esds in distances, angles
 and torsion angles; correlations between esds in cell parameters are only
 used when they are defined by crystal symmetry.  An approximate (isotropic)
 treatment of cell esds is used for estimating esds involving l.s. planes.
;
loop_
    _geom_bond_atom_site_label_1
    _geom_bond_atom_site_label_2
    _geom_bond_distance
    _geom_bond_site_symmetry_2
    _geom_bond_publ_flag
C1 C12 1.382(10) . ?
C1 C9 1.398(9) . ?
C1 C4 1.505(10) . ?
C2 C18 1.387(10) . ?
C2 C3 1.400(11) . ?
C2 H2 0.94 . ?
C3 C14 1.401(12) . ?
C3 H3 0.94 . ?
C4 C8 1.370(9) . ?
C4 C7 1.420(9) . ?
C5 C15 1.342(9) . ?
C5 C11 1.472(9) . ?
C5 C16 1.510(10) . ?
C6 C10 1.370(9) . ?
C6 C13 1.410(9) . ?
C6 H6 0.94 . ?
C7 C11 1.350(9) . ?
C7 H7 0.94 . ?
C8 C15 1.417(10) . ?
C8 H8 0.94 . ?
C9 C10 1.411(9) . ?
C9 H9 0.94 . ?
C10 C19 1.499(9) . ?
C11 H11 0.94 . ?
C12 C13 1.379(10) . ?
C12 H12 0.94 . ?
C13 C14 1.474(9) . ?
C14 C20 1.401(9) . ?
C15 H15 0.94 . ?
C16 O6 1.241(8) . ?
C16 O5 1.281(9) . ?
C16 Ba1 3.232(8) . ?
C17 O3 1.237(9) . ?
C17 O7 1.315(11) . ?
C17 C18 1.467(9) . ?
C18 C24 1.389(10) . ?
C19 C21 1.357(10) . ?
C19 C22 1.404(9) . ?
C20 C24 1.374(10) . ?
C20 H20 0.94 . ?
C21 C23 1.401(10) . ?
C21 H21 0.94 . ?
C22 C25 1.354(9) . ?
C22 H22 0.94 . ?
C23 C26 1.395(10) . ?
C23 H23 0.94 . ?
C24 H24 0.94 . ?
C25 C26 1.393(10) . ?
C25 H25 0.94 . ?
C26 C27 1.520(10) . ?
C27 O1 1.240(9) . ?
C27 O2 1.264(9) . ?
C27 Ba1 3.151(8) 3_644 ?
O1 Ba1 2.797(5) 2_764 ?
O1 Ba1 2.837(5) 3_644 ?
O2 Ba1 2.758(5) 2_664 ?
O2 Ba1 2.782(5) 3_644 ?
O3 Ba1 2.791(5) 3_654 ?
O4 Ba1 2.754(9) . ?
O5 Ba1 2.826(5) . ?
O6 Ba1 2.776(5) 4_565 ?
O6 Ba1 2.946(5) . ?
O7 H7A 0.83 . ?
Ba1 O2 2.758(5) 2_665 ?
Ba1 O6 2.775(5) 4_465 ?
Ba1 O2 2.782(5) 3_655 ?
Ba1 O3 2.791(5) 3_645 ?
Ba1 O1 2.797(6) 2_765 ?
Ba1 O1 2.837(5) 3_655 ?
Ba1 C27 3.151(8) 3_655 ?
Ba1 Ba1 4.2601(6) 4_565 ?
 
loop_
    _geom_angle_atom_site_label_1
    _geom_angle_atom_site_label_2
    _geom_angle_atom_site_label_3
    _geom_angle
    _geom_angle_site_symmetry_1
    _geom_angle_site_symmetry_3
    _geom_angle_publ_flag
C12 C1 C9 119.6(7) . . ?
C12 C1 C4 122.7(6) . . ?
C9 C1 C4 117.7(6) . . ?
C18 C2 C3 119.3(10) . . ?
C18 C2 H2 120.3 . . ?
C3 C2 H2 120.3 . . ?
C2 C3 C14 122.5(8) . . ?
C2 C3 H3 118.8 . . ?
C14 C3 H3 118.8 . . ?
C8 C4 C7 118.5(7) . . ?
C8 C4 C1 121.3(6) . . ?
C7 C4 C1 120.2(6) . . ?
C15 C5 C11 118.6(6) . . ?
C15 C5 C16 122.0(6) . . ?
C11 C5 C16 119.2(6) . . ?
C10 C6 C13 120.9(7) . . ?
C10 C6 H6 119.6 . . ?
C13 C6 H6 119.6 . . ?
C11 C7 C4 121.8(7) . . ?
C11 C7 H7 119.1 . . ?
C4 C7 H7 119.1 . . ?
C4 C8 C15 120.6(6) . . ?
C4 C8 H8 119.7 . . ?
C15 C8 H8 119.7 . . ?
C1 C9 C10 119.6(6) . . ?
C1 C9 H9 120.2 . . ?
C10 C9 H9 120.2 . . ?
C6 C10 C9 119.6(6) . . ?
C6 C10 C19 122.2(6) . . ?
C9 C10 C19 118.1(6) . . ?
C7 C11 C5 119.0(7) . . ?
C7 C11 H11 120.5 . . ?
C5 C11 H11 120.5 . . ?
C13 C12 C1 121.3(7) . . ?
C13 C12 H12 119.4 . . ?
C1 C12 H12 119.4 . . ?
C12 C13 C6 118.8(6) . . ?
C12 C13 C14 121.1(6) . . ?
C6 C13 C14 120.0(6) . . ?
C3 C14 C20 116.4(6) . . ?
C3 C14 C13 122.0(6) . . ?
C20 C14 C13 121.5(7) . . ?
C5 C15 C8 121.3(6) . . ?
C5 C15 H15 119.3 . . ?
C8 C15 H15 119.3 . . ?
O6 C16 O5 124.1(7) . . ?
O6 C16 C5 117.7(6) . . ?
O5 C16 C5 118.0(6) . . ?
O6 C16 Ba1 65.7(4) . . ?
O5 C16 Ba1 60.3(4) . . ?
C5 C16 Ba1 161.1(5) . . ?
O3 C17 O7 122.2(7) . . ?
O3 C17 C18 122.5(8) . . ?
O7 C17 C18 115.3(7) . . ?
C2 C18 C24 118.7(8) . . ?
C2 C18 C17 123.0(8) . . ?
C24 C18 C17 118.3(7) . . ?
C21 C19 C22 119.2(6) . . ?
C21 C19 C10 121.0(6) . . ?
C22 C19 C10 119.8(6) . . ?
C24 C20 C14 121.2(7) . . ?
C24 C20 H20 119.4 . . ?
C14 C20 H20 119.4 . . ?
C19 C21 C23 120.6(7) . . ?
C19 C21 H21 119.7 . . ?
C23 C21 H21 119.7 . . ?
C25 C22 C19 120.8(7) . . ?
C25 C22 H22 119.6 . . ?
C19 C22 H22 119.6 . . ?
C26 C23 C21 119.9(7) . . ?
C26 C23 H23 120.1 . . ?
C21 C23 H23 120.1 . . ?
C20 C24 C18 121.8(7) . . ?
C20 C24 H24 119.1 . . ?
C18 C24 H24 119.1 . . ?
C22 C25 C26 120.8(7) . . ?
C22 C25 H25 119.6 . . ?
C26 C25 H25 119.6 . . ?
C25 C26 C23 118.6(6) . . ?
C25 C26 C27 121.7(7) . . ?
C23 C26 C27 119.4(6) . . ?
O1 C27 O2 125.4(7) . . ?
O1 C27 C26 118.6(6) . . ?
O2 C27 C26 116.0(6) . . ?
O1 C27 Ba1 64.1(4) . 3_644 ?
O2 C27 Ba1 61.6(4) . 3_644 ?
C26 C27 Ba1 174.9(5) . 3_644 ?
C27 O1 Ba1 136.7(5) . 2_764 ?
C27 O1 Ba1 92.8(4) . 3_644 ?
Ba1 O1 Ba1 98.25(15) 2_764 3_644 ?
C27 O2 Ba1 149.9(5) . 2_664 ?
C27 O2 Ba1 94.8(4) . 3_644 ?
Ba1 O2 Ba1 100.52(15) 2_664 3_644 ?
C17 O3 Ba1 142.7(5) . 3_654 ?
C16 O5 Ba1 96.5(4) . . ?
C16 O6 Ba1 152.2(5) . 4_565 ?
C16 O6 Ba1 91.7(4) . . ?
Ba1 O6 Ba1 96.19(14) 4_565 . ?
C17 O7 H7A 109.5 . . ?
O4 Ba1 O2 78.6(3) . 2_665 ?
O4 Ba1 O6 132.9(2) . 4_465 ?
O2 Ba1 O6 65.99(16) 2_665 4_465 ?
O4 Ba1 O2 96.9(3) . 3_655 ?
O2 Ba1 O2 118.30(13) 2_665 3_655 ?
O6 Ba1 O2 75.43(18) 4_465 3_655 ?
O4 Ba1 O3 74.5(3) . 3_645 ?
O2 Ba1 O3 86.79(15) 2_665 3_645 ?
O6 Ba1 O3 130.04(18) 4_465 3_645 ?
O2 Ba1 O3 151.86(17) 3_655 3_645 ?
O4 Ba1 O1 72.9(3) . 2_765 ?
O2 Ba1 O1 150.23(18) 2_665 2_765 ?
O6 Ba1 O1 142.41(15) 4_465 2_765 ?
O2 Ba1 O1 74.42(15) 3_655 2_765 ?
O3 Ba1 O1 77.44(16) 3_645 2_765 ?
O4 Ba1 O5 137.7(2) . . ?
O2 Ba1 O5 115.20(19) 2_665 . ?
O6 Ba1 O5 86.98(14) 4_465 . ?
O2 Ba1 O5 108.45(17) 3_655 . ?
O3 Ba1 O5 67.09(16) 3_645 . ?
O1 Ba1 O5 81.79(16) 2_765 . ?
O4 Ba1 O1 73.9(3) . 3_655 ?
O2 Ba1 O1 74.16(16) 2_665 3_655 ?
O6 Ba1 O1 67.48(16) 4_465 3_655 ?
O2 Ba1 O1 46.63(15) 3_655 3_655 ?
O3 Ba1 O1 145.66(17) 3_645 3_655 ?
O1 Ba1 O1 105.47(17) 2_765 3_655 ?
O5 Ba1 O1 147.01(16) . 3_655 ?
O4 Ba1 O6 137.5(3) . . ?
O2 Ba1 O6 143.68(19) 2_665 . ?
O6 Ba1 O6 80.95(11) 4_465 . ?
O2 Ba1 O6 63.40(16) 3_655 . ?
O3 Ba1 O6 104.68(16) 3_645 . ?
O1 Ba1 O6 65.70(15) 2_765 . ?
O5 Ba1 O6 45.35(14) . . ?
O1 Ba1 O6 107.57(15) 3_655 . ?
O4 Ba1 C27 83.8(3) . 3_655 ?
O2 Ba1 C27 96.52(16) 2_665 3_655 ?
O6 Ba1 C27 71.10(17) 4_465 3_655 ?
O2 Ba1 C27 23.55(17) 3_655 3_655 ?
O3 Ba1 C27 157.0(2) 3_645 3_655 ?
O1 Ba1 C27 89.08(15) 2_765 3_655 ?
O5 Ba1 C27 129.86(18) . 3_655 ?
O1 Ba1 C27 23.15(16) 3_655 3_655 ?
O6 Ba1 C27 86.06(17) . 3_655 ?
O4 Ba1 C16 146.3(2) . . ?
O2 Ba1 C16 129.6(2) 2_665 . ?
O6 Ba1 C16 80.28(16) 4_465 . ?
O2 Ba1 C16 85.27(19) 3_655 . ?
O3 Ba1 C16 87.78(17) 3_645 . ?
O1 Ba1 C16 75.36(19) 2_765 . ?
O5 Ba1 C16 23.19(16) . . ?
O1 Ba1 C16 126.38(17) 3_655 . ?
O6 Ba1 C16 22.58(15) . . ?
C27 Ba1 C16 106.94(19) 3_655 . ?
O4 Ba1 Ba1 100.0(3) . 4_565 ?
O2 Ba1 Ba1 157.78(11) 2_665 4_565 ?
O6 Ba1 Ba1 101.65(11) 4_465 4_565 ?
O2 Ba1 Ba1 39.53(9) 3_655 4_565 ?
O3 Ba1 Ba1 114.44(12) 3_645 4_565 ?
O1 Ba1 Ba1 41.23(10) 2_765 4_565 ?
O5 Ba1 Ba1 80.93(11) . 4_565 ?
O1 Ba1 Ba1 84.11(11) 3_655 4_565 ?
O6 Ba1 Ba1 40.37(10) . 4_565 ?
C27 Ba1 Ba1 61.41(12) 3_655 4_565 ?
C16 Ba1 Ba1 61.23(14) . 4_565 ?
 
loop_
    _geom_torsion_atom_site_label_1
    _geom_torsion_atom_site_label_2
    _geom_torsion_atom_site_label_3
    _geom_torsion_atom_site_label_4
    _geom_torsion
    _geom_torsion_site_symmetry_1
    _geom_torsion_site_symmetry_2
    _geom_torsion_site_symmetry_3
    _geom_torsion_site_symmetry_4
    _geom_torsion_publ_flag
C18 C2 C3 C14 3.7(11) . . . . ?
C12 C1 C4 C8 -33.7(11) . . . . ?
C9 C1 C4 C8 146.3(7) . . . . ?
C12 C1 C4 C7 145.3(7) . . . . ?
C9 C1 C4 C7 -34.7(10) . . . . ?
C8 C4 C7 C11 -0.4(12) . . . . ?
C1 C4 C7 C11 -179.4(7) . . . . ?
C7 C4 C8 C15 1.0(11) . . . . ?
C1 C4 C8 C15 179.9(7) . . . . ?
C12 C1 C9 C10 -4.9(10) . . . . ?
C4 C1 C9 C10 175.0(6) . . . . ?
C13 C6 C10 C9 2.2(11) . . . . ?
C13 C6 C10 C19 178.3(6) . . . . ?
C1 C9 C10 C6 2.3(10) . . . . ?
C1 C9 C10 C19 -174.0(6) . . . . ?
C4 C7 C11 C5 -2.2(12) . . . . ?
C15 C5 C11 C7 4.2(11) . . . . ?
C16 C5 C11 C7 178.6(7) . . . . ?
C9 C1 C12 C13 3.2(10) . . . . ?
C4 C1 C12 C13 -176.8(7) . . . . ?
C1 C12 C13 C6 1.2(11) . . . . ?
C1 C12 C13 C14 -176.2(7) . . . . ?
C10 C6 C13 C12 -4.0(11) . . . . ?
C10 C6 C13 C14 173.5(7) . . . . ?
C2 C3 C14 C20 -4.3(12) . . . . ?
C2 C3 C14 C13 177.6(7) . . . . ?
C12 C13 C14 C3 -144.5(8) . . . . ?
C6 C13 C14 C3 38.1(11) . . . . ?
C12 C13 C14 C20 37.5(11) . . . . ?
C6 C13 C14 C20 -140.0(7) . . . . ?
C11 C5 C15 C8 -3.8(10) . . . . ?
C16 C5 C15 C8 -177.9(7) . . . . ?
C4 C8 C15 C5 1.2(11) . . . . ?
C15 C5 C16 O6 -3.0(11) . . . . ?
C11 C5 C16 O6 -177.1(7) . . . . ?
C15 C5 C16 O5 172.5(7) . . . . ?
C11 C5 C16 O5 -1.6(11) . . . . ?
C15 C5 C16 Ba1 92.7(15) . . . . ?
C11 C5 C16 Ba1 -81.4(15) . . . . ?
C3 C2 C18 C24 -1.5(10) . . . . ?
C3 C2 C18 C17 178.9(7) . . . . ?
O3 C17 C18 C2 -172.6(7) . . . . ?
O7 C17 C18 C2 8.3(10) . . . . ?
O3 C17 C18 C24 7.9(11) . . . . ?
O7 C17 C18 C24 -171.3(7) . . . . ?
C6 C10 C19 C21 143.5(8) . . . . ?
C9 C10 C19 C21 -40.4(10) . . . . ?
C6 C10 C19 C22 -39.5(10) . . . . ?
C9 C10 C19 C22 136.6(7) . . . . ?
C3 C14 C20 C24 2.8(12) . . . . ?
C13 C14 C20 C24 -179.1(7) . . . . ?
C22 C19 C21 C23 -2.7(12) . . . . ?
C10 C19 C21 C23 174.3(7) . . . . ?
C21 C19 C22 C25 4.3(11) . . . . ?
C10 C19 C22 C25 -172.7(7) . . . . ?
C19 C21 C23 C26 -0.2(12) . . . . ?
C14 C20 C24 C18 -0.8(12) . . . . ?
C2 C18 C24 C20 0.1(11) . . . . ?
C17 C18 C24 C20 179.7(7) . . . . ?
C19 C22 C25 C26 -3.0(11) . . . . ?
C22 C25 C26 C23 0.1(11) . . . . ?
C22 C25 C26 C27 174.4(7) . . . . ?
C21 C23 C26 C25 1.5(11) . . . . ?
C21 C23 C26 C27 -172.9(7) . . . . ?
C25 C26 C27 O1 149.9(7) . . . . ?
C23 C26 C27 O1 -35.9(10) . . . . ?
C25 C26 C27 O2 -28.3(10) . . . . ?
C23 C26 C27 O2 145.9(7) . . . . ?
C25 C26 C27 Ba1 -89(6) . . . 3_644 ?
C23 C26 C27 Ba1 85(6) . . . 3_644 ?
O2 C27 O1 Ba1 98.3(9) . . . 2_764 ?
C26 C27 O1 Ba1 -79.7(9) . . . 2_764 ?
Ba1 C27 O1 Ba1 105.1(6) 3_644 . . 2_764 ?
O2 C27 O1 Ba1 -6.8(9) . . . 3_644 ?
C26 C27 O1 Ba1 175.2(6) . . . 3_644 ?
O1 C27 O2 Ba1 127.7(8) . . . 2_664 ?
C26 C27 O2 Ba1 -54.2(13) . . . 2_664 ?
Ba1 C27 O2 Ba1 120.7(11) 3_644 . . 2_664 ?
O1 C27 O2 Ba1 7.0(9) . . . 3_644 ?
C26 C27 O2 Ba1 -175.0(6) . . . 3_644 ?
O7 C17 O3 Ba1 11.7(14) . . . 3_654 ?
C18 C17 O3 Ba1 -167.4(5) . . . 3_654 ?
O6 C16 O5 Ba1 16.6(8) . . . . ?
C5 C16 O5 Ba1 -158.5(6) . . . . ?
O5 C16 O6 Ba1 91.0(12) . . . 4_565 ?
C5 C16 O6 Ba1 -93.9(10) . . . 4_565 ?
Ba1 C16 O6 Ba1 106.8(9) . . . 4_565 ?
O5 C16 O6 Ba1 -15.8(8) . . . . ?
C5 C16 O6 Ba1 159.3(6) . . . . ?
C16 O5 Ba1 O4 -125.1(6) . . . . ?
C16 O5 Ba1 O2 133.8(4) . . . 2_665 ?
C16 O5 Ba1 O6 72.2(4) . . . 4_465 ?
C16 O5 Ba1 O2 -1.4(5) . . . 3_655 ?
C16 O5 Ba1 O3 -151.6(5) . . . 3_645 ?
C16 O5 Ba1 O1 -71.8(4) . . . 2_765 ?
C16 O5 Ba1 O1 34.0(6) . . . 3_655 ?
C16 O5 Ba1 O6 -8.1(4) . . . . ?
C16 O5 Ba1 C27 10.0(5) . . . 3_655 ?
C16 O5 Ba1 Ba1 -30.1(4) . . . 4_565 ?
C16 O6 Ba1 O4 125.7(5) . . . . ?
Ba1 O6 Ba1 O4 -27.6(4) 4_565 . . . ?
C16 O6 Ba1 O2 -62.3(5) . . . 2_665 ?
Ba1 O6 Ba1 O2 144.4(2) 4_565 . . 2_665 ?
C16 O6 Ba1 O6 -86.4(4) . . . 4_465 ?
Ba1 O6 Ba1 O6 120.2(2) 4_565 . . 4_465 ?
C16 O6 Ba1 O2 -164.6(5) . . . 3_655 ?
Ba1 O6 Ba1 O2 42.04(17) 4_565 . . 3_655 ?
C16 O6 Ba1 O3 42.7(5) . . . 3_645 ?
Ba1 O6 Ba1 O3 -110.62(18) 4_565 . . 3_645 ?
C16 O6 Ba1 O1 111.3(5) . . . 2_765 ?
Ba1 O6 Ba1 O1 -42.03(15) 4_565 . . 2_765 ?
C16 O6 Ba1 O5 8.3(4) . . . . ?
Ba1 O6 Ba1 O5 -145.1(3) 4_565 . . . ?
C16 O6 Ba1 O1 -149.2(4) . . . 3_655 ?
Ba1 O6 Ba1 O1 57.42(19) 4_565 . . 3_655 ?
C16 O6 Ba1 C27 -157.9(4) . . . 3_655 ?
Ba1 O6 Ba1 C27 48.74(18) 4_565 . . 3_655 ?
Ba1 O6 Ba1 C16 -153.4(5) 4_565 . . . ?
C16 O6 Ba1 Ba1 153.4(5) . . . 4_565 ?
O6 C16 Ba1 O4 -81.6(7) . . . . ?
O5 C16 Ba1 O4 83.3(7) . . . . ?
C5 C16 Ba1 O4 173.5(13) . . . . ?
O6 C16 Ba1 O2 137.1(4) . . . 2_665 ?
O5 C16 Ba1 O2 -58.0(5) . . . 2_665 ?
C5 C16 Ba1 O2 32.2(15) . . . 2_665 ?
O6 C16 Ba1 O6 89.8(4) . . . 4_465 ?
O5 C16 Ba1 O6 -105.3(4) . . . 4_465 ?
C5 C16 Ba1 O6 -15.1(14) . . . 4_465 ?
O6 C16 Ba1 O2 13.8(4) . . . 3_655 ?
O5 C16 Ba1 O2 178.7(4) . . . 3_655 ?
C5 C16 Ba1 O2 -91.1(14) . . . 3_655 ?
O6 C16 Ba1 O3 -138.9(4) . . . 3_645 ?
O5 C16 Ba1 O3 26.0(4) . . . 3_645 ?
C5 C16 Ba1 O3 116.2(14) . . . 3_645 ?
O6 C16 Ba1 O1 -61.3(4) . . . 2_765 ?
O5 C16 Ba1 O1 103.6(4) . . . 2_765 ?
C5 C16 Ba1 O1 -166.2(14) . . . 2_765 ?
O6 C16 Ba1 O5 -164.9(7) . . . . ?
C5 C16 Ba1 O5 90.2(15) . . . . ?
O6 C16 Ba1 O1 37.3(5) . . . 3_655 ?
O5 C16 Ba1 O1 -157.8(4) . . . 3_655 ?
C5 C16 Ba1 O1 -67.6(14) . . . 3_655 ?
O5 C16 Ba1 O6 164.9(7) . . . . ?
C5 C16 Ba1 O6 -104.9(15) . . . . ?
O6 C16 Ba1 C27 23.1(5) . . . 3_655 ?
O5 C16 Ba1 C27 -172.0(4) . . . 3_655 ?
C5 C16 Ba1 C27 -81.8(14) . . . 3_655 ?
O6 C16 Ba1 Ba1 -19.4(4) . . . 4_565 ?
O5 C16 Ba1 Ba1 145.6(5) . . . 4_565 ?
C5 C16 Ba1 Ba1 -124.2(14) . . . 4_565 ?
 
# The following lines are used to test the character set of files sent by
# network email or other means. They are not part of the CIF data set
# abcdefghijklmnopqrstuvwxyzABCDEFGHIJKLMNOPQRSTUVWXYZ0123456789
# !@#$%^&*()_+{}:"~<>?|\-=[];'`,./
 
# END of CIF
